# Supplementary material for: Large Isoform of Mammalian Relative of DnaJ is a Major Determinant of Human Susceptibility to HIV-1 Infection
Source: PubMed Central journal article supplement (PMC4457413; doi:10.1016/j.ebiom.2014.10.002), 2014-10-07
Supplement: mmc1.pdf [file mmc1.pdf]

## **Supplemental Information**

### **Supplementary Materials and Methods**

#### **Production of lentivirus-packed target genes**

293T cells ( $2 \times 10^6$ ) were transfected using Lipofectamine 2000 (Life Technologies) with 0.45  $\mu\text{g}$  pCMV- $\Delta\text{R8.91}$ , 0.05  $\mu\text{g}$  pMD.G, and 0.5  $\mu\text{g}$  MRJ-L shRNA vector or a MRJ-L expression plasmid to generate pseudotyped lentiviruses carrying the corresponding genes. Cellular supernatants were harvested at 72 h post-transfection. Viral titer was determined using the protocol provided by the RNAi Core Facility, Academia Sinica, Taiwan (<http://rna.genmed.sinica.edu.tw/protocols>).

#### **Fluorescence Confocal Imaging**

HeLa cells were co-transfected with pEGFP-Vpr and pcDNA-HA-MRJ expression vectors on glass cover slides. After 24 h, cells were fixed with ice-cold acetone for 10 min and stained with anti-HA antibody (Roche, Palo Alto, CA, USA) for 1 h, washed three times with PBS, and subsequently incubated with AlexaFluor-conjugated anti-mouse antibody for 30 min. After washing two times with PBS, cells were stained with 3  $\mu\text{M}$  4', 6'-diamidino-2-phenylindole (DAPI) at room temperature for 5 min and

observed under confocal microscopy (Leica TCS SP2).

## Supplementary Tables

### Supplementary Table 1

Demographic data of HIV-1 positive and negative participants from commercial MSM community.

| Variable                   | HIV-1 (+)<br>N=20<br>n(%) | HIV-1 (-)<br>N=30<br>n(%) | Total<br>N=50<br>n(%) | P<br>value |
|----------------------------|---------------------------|---------------------------|-----------------------|------------|
| Age                        |                           |                           |                       | 0.079      |
| <30                        | 12 (60)                   | 19 (63)                   | 31 (62)               |            |
| ≥30                        | 8 (40)                    | 6 (20)                    | 14 (28)               |            |
| NA                         | 0 (0)                     | 5 (17)                    | 5 (10)                |            |
| Sexual orientation         |                           |                           |                       | 0.440      |
| Heterosexual               | 1 (5)                     | 1 (3)                     | 2 (4)                 |            |
| Homosexual                 | 18 (90)                   | 29 (97)                   | 47 (94)               |            |
| Bisexual                   | 1 (5)                     | 0 (0)                     | 1 (2)                 |            |
| NA                         | 0 (0)                     | 0 (0)                     | 0 (0)                 |            |
| Marital status             |                           |                           |                       | 0.594      |
| Single                     | 17 (85)                   | 27 (90)                   | 44 (88)               |            |
| Married                    | 0 (0)                     | 0 (0)                     | 0 (0)                 |            |
| Divorced/Separated/Widowed | 3 (15)                    | 3 (10)                    | 6 (12)                |            |
| Education                  |                           |                           |                       | 0.768      |
| <Junior high school        | 0 (0)                     | 0 (0)                     | 0 (0)                 |            |
| ≥Senior high school        | 19 (95)                   | 29 (97)                   | 48 (96)               |            |
| NA                         | 1 (5)                     | 1 (3)                     | 2 (4)                 |            |
| Occupation                 |                           |                           |                       | 0.464      |

|                                                          |         |         |         |       |
|----------------------------------------------------------|---------|---------|---------|-------|
| Student                                                  | 4 (20)  | 8 (27)  | 12 (24) |       |
| Government employees                                     | 5 (25)  | 3 (10)  | 8 (16)  |       |
| Office worker                                            | 7 (35)  | 13 (43) | 20 (40) |       |
| Professional                                             | 2 (10)  | 2 (7)   | 4 (8)   |       |
| Unemployed/ Other                                        | 1 (5)   | 4 (13)  | 5 (10)  |       |
| NA                                                       | 1 (5)   | 0 (0)   | 1 (2)   |       |
| Number of sexual partners                                |         |         |         | 0.116 |
| 1                                                        | 5 (25)  | 5 (17)  | 10 (20) |       |
| 2-3                                                      | 9 (45)  | 22 (73) | 31 (62) |       |
| ≥4                                                       | 1 (5)   | 2 (7)   | 3 (6)   |       |
| NA                                                       | 3 (15)  | 0 (0)   | 3 (6)   |       |
| Role and protection during anal intercourse              |         |         |         | 0.07  |
| Exclusively insertive with condom                        | 0       | 4 (13)  | 4 (8)   |       |
| Exclusively insertive without regular condom             | 0       | 3 (10)  | 3 (6)   |       |
| Exclusively receptive / Versatile with condom            | 6 (30)  | 9 (30)  | 15 (30) |       |
| Exclusively receptive / Versatile without regular condom | 12 (60) | 10 (33) | 22 (44) |       |
| Oral sex                                                 | 0 (0)   | 3 (10)  | 3 (6)   |       |

|                                                              |         |         |         |       |
|--------------------------------------------------------------|---------|---------|---------|-------|
| NA                                                           | 2 (10)  | 1 (3)   | 3 (6)   |       |
| Times of sexual contact per week                             |         |         |         | 0.364 |
| <1                                                           | 3 (15)  | 9 (30)  | 12 (24) |       |
| 1-3                                                          | 7 (35)  | 12 (40) | 19 (38) |       |
| >3                                                           | 4 (20)  | 2 (7)   | 6 (12)  |       |
| NA                                                           | 6 (30)  | 7 (23)  | 13 (26) |       |
| Recreational drug usage                                      |         |         |         | 0.451 |
| No                                                           | 9 (45)  | 17 (57) | 26 (52) |       |
| Yes                                                          | 8 (40)  | 7 (23)  | 15 (30) |       |
| NA                                                           | 3 (15)  | 6 (20)  | 9 (18)  |       |
| Oil- or petroleum-based lubricants during sexual intercourse |         |         |         | 0.536 |
| Saliva                                                       | 8 (40)  | 14 (47) | 22 (44) |       |
| Oil-based <sup>a</sup>                                       | 6 (30)  | 5 (17)  | 11 (22) |       |
| NA                                                           | 6 (30)  | 11 (37) | 17 (34) |       |
| History of having sexually transmitted diseases              |         |         |         | 0.012 |
| No                                                           | 8 (40)  | 24 (80) | 32 (64) |       |
| Yes                                                          | 2 (10)  | 0 (0)   | 2 (4)   |       |
| NA                                                           | 10 (50) | 6 (20)  | 16 (32) |       |
| Frequency of lubricant usage                                 |         |         |         | 0.719 |
| Always                                                       | 14 (70) | 24 (80) | 38 (76) |       |
| Frequently/Occasionally/<br>Rarely/Never                     | 3 (15)  | 3 (10)  | 6 (12)  |       |
| NA                                                           | 3 (15)  | 3 (10)  | 6 (12)  |       |

---

NA, not available.

**Supplementary Table 2**

Risk factors for HIV-1 infection were analyzed by using Bayesian multiple logistic regression.

---

|                         | Odds Ratio | 2.5% credible interval | 97.5% credible interval |
|-------------------------|------------|------------------------|-------------------------|
| MRJ levels              |            |                        |                         |
| MRJ Low                 | 1          |                        |                         |
| MRJ Medium              | 7.601      | 1.37                   | 69.25                   |
| MRJ High                | 41.57      | 4.285                  | 705.7                   |
| Role of sexual behavior |            |                        |                         |
| Insertive anal sex      | 1          |                        |                         |
| Receptive anal sex      | 43.99      | 2.681                  | 2957                    |
| Oral sex                | 0.2145     | 8.58E-05               | 73.13                   |

---

## Supplementary Figure 1

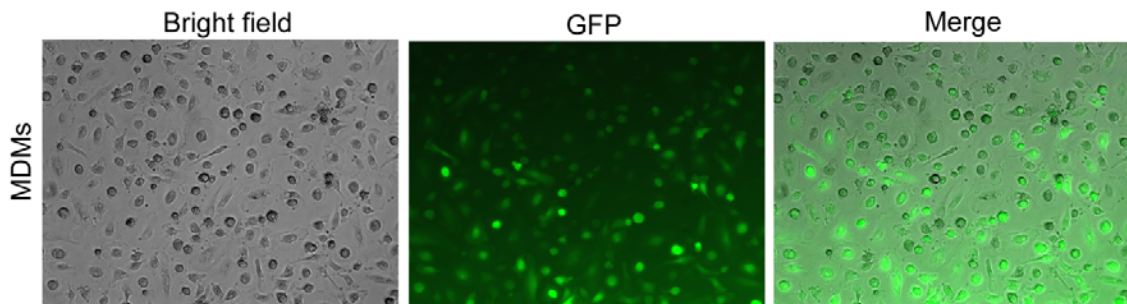

**Supplementary Fig. 1. Lentiviral transduction efficiency in primary MDMs.** MDMs at day 7 of differentiation were transduced with lentivirus packed with GFP mRNA. The transduction efficiency was about 50-70% as measured by the percentage of cells expressing GFP.
